# Supplementary material
Source: PubMed Central journal article supplement (PMC5526718)
Supplement: NIHMS882528-supplement-Visual_abstract.pdf [file NIHMS882528-supplement-Visual_abstract.pdf]

# Visual Abstract

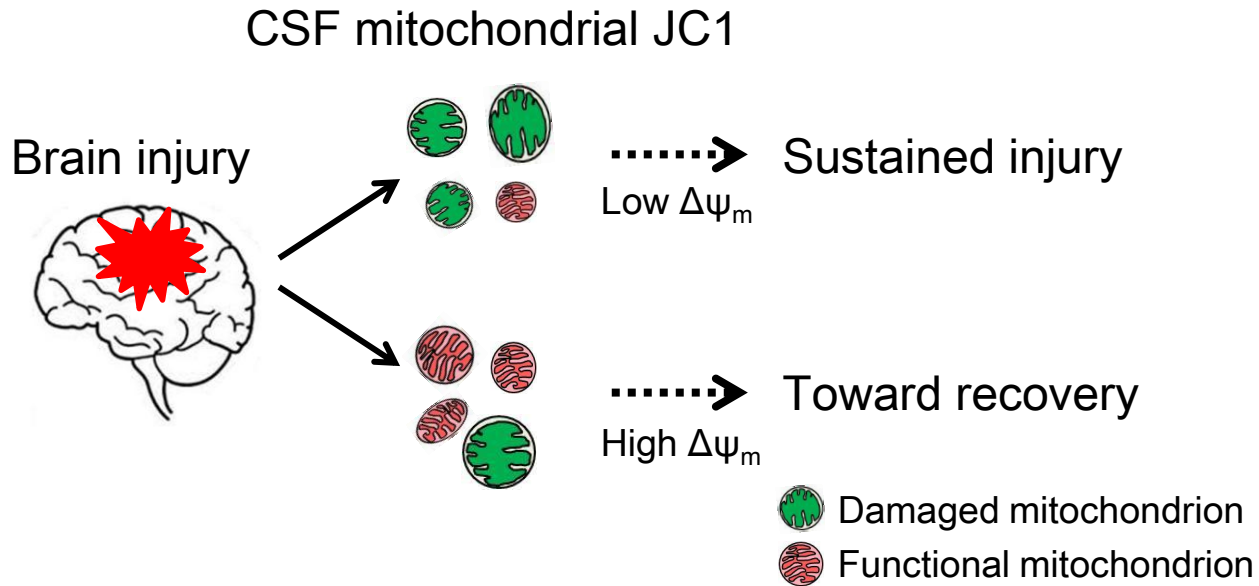

Extracellular mitochondria are detected in rat or human CSF, and JC1 levels are reduced after subarachnoid hemorrhage (SAH). Higher mitochondrial membrane potentials in the CSF may be correlated with good clinical recovery after SAH onset. Therefore, CSF extracellular mitochondria may provide a “biomarker-like” glimpse into brain integrity and recovery after injury.  $\Delta\psi_m$  : mitochondrial membrane potential
